# Supplementary material
Source: ML conference proceedings conference paper supplement (https://proceedings.neurips.cc/paper_files/paper/2018/hash/0c74b7f78409a4022a2c4c5a5ca3ee19-Abstract.html)
Supplement: Supplementary file [file 0c74b7f78409a4022a2c4c5a5ca3ee19-Supplemental.zip]

## Appendix 1: Preliminaries

### Probabilistic Tail Bounds

**Theorem 1** (Hoeffding's Inequality (Theorem 2.8 of [1])). *Let  $X_1, \dots, X_n$  be independent random variables such that  $X_i$  takes its values in  $[a_i, b_i]$  almost surely for all  $i \leq n$ . Let*

$$S = \sum_{i=1}^n (X_i - \mathbb{E}[X_i]),$$

*then for every  $t > 0$ ,*

$$\Pr(S \geq t) \leq \exp\left(-\frac{2n^2 t^2}{\sum_{i=1}^n (a_i - b_i)^2}\right).$$

**Theorem 2** (Cantelli's Inequality (Equation 7 of [2])). *The inequality states that*

$$\Pr(X - \mu \geq \lambda) \begin{cases} \leq \frac{\sigma^2}{\sigma^2 + \lambda^2} & \text{if } \lambda > 0, \\ \geq 1 - \frac{\sigma^2}{\sigma^2 + \lambda^2} & \text{if } \lambda < 0. \end{cases}$$

*where  $X$  is a real-valued random variable,  $\Pr$  is the probability measure,  $\mu$  is the expected value of  $X$ ,  $\sigma^2$  is the variance of  $X$ .*

### Basic Derivations for Multivariate Gaussian Mixtures

**Lemma 1.** *For  $N$  vectors  $\mathbf{x}_1, \dots, \mathbf{x}_N$ ,  $\mathbf{x}_i \in \mathbb{R}^m \forall i$ ,  $N$  constants  $\alpha_1, \dots, \alpha_N$ ,  $\alpha_i > 0 \forall i$ ,  $\sum_{i=1}^N \alpha_i = 1$  and target vector  $\mathbf{y} \in \mathbb{R}^m$ ,*

$$\sum_{i=1}^N \alpha_i \mathbf{x}_i^\top \mathbf{y} \leq \left(\max_i \|\mathbf{x}_i\|_2\right) \cdot \|\mathbf{y}\|_2$$

*Proof.* For each vector  $\mathbf{x}_i$ , we know by the Cauchy-Schwarz Inequality that:

$$\mathbf{x}_i^\top \mathbf{y} \leq \|\mathbf{x}_i\|_2 \cdot \|\mathbf{y}\|_2 \quad (1)$$

And:

$$\|\mathbf{x}_k\|_2 \leq \max_i \|\mathbf{x}_i\|_2 \quad \forall k \quad (2)$$

Combining the above, we have:

$$\sum_{i=1}^N \alpha_i \mathbf{x}_i^\top \mathbf{y} \leq \sum_{i=1}^N \alpha_i \|\mathbf{x}_i\|_2 \cdot \|\mathbf{y}\|_2 \leq \left(\sum_{i=1}^N \alpha_i\right) \left(\max_i \|\mathbf{x}_i\|_2\right) \cdot \|\mathbf{y}\|_2 = \left(\max_i \|\mathbf{x}_i\|_2\right) \cdot \|\mathbf{y}\|_2 \quad (3)$$

□

**Lemma 2.** *For  $N$  vectors  $\mathbf{x}_1, \dots, \mathbf{x}_N$ ,  $\mathbf{x}_i \in \mathbb{R}^m \forall i$ , and target vector  $\mathbf{y} \in \mathbb{R}^m$ ,*

$$\sum_{i=1}^N \mathbf{x}_i^\top \mathbf{y} \geq -N \left(\max_i \|\mathbf{x}_i\|_2\right) \cdot \|\mathbf{y}\|_2$$

*Proof.* For each vector  $\mathbf{x}_i$ , we know by the Cauchy-Schwarz Inequality that:

$$-\mathbf{x}_i^\top \mathbf{y} \leq \|-\mathbf{x}_i\|_2 \cdot \|\mathbf{y}\|_2 \quad (4)$$

$$= \|\mathbf{x}_i\|_2 \cdot \|\mathbf{y}\|_2 \quad (5)$$

Multiplying the above equation by  $-1$ , we have:

$$\mathbf{x}_i^\top \mathbf{y} \geq -\|\mathbf{x}_i\|_2 \cdot \|\mathbf{y}\|_2 \quad (6)$$

And:

$$\|\mathbf{x}_k\|_2 \leq \max_i \|\mathbf{x}_i\|_2 \quad \forall k \quad (7)$$

Multiplying the above equation by  $-1$ , we have:

$$-\|\mathbf{x}_k\|_2 \geq -\max_i \|\mathbf{x}_i\|_2 \quad \forall k \quad (8)$$

Combining the above, we have:

$$\sum_{i=1}^N \mathbf{x}_i^\top \mathbf{y} \geq -\sum_{i=1}^N \|\mathbf{x}_i\|_2 \cdot \|\mathbf{y}\|_2 \geq -N \left( \max_i \|\mathbf{x}_i\|_2 \right) \cdot \|\mathbf{y}\|_2 \quad (9)$$

□

**Lemma 3.** For an  $n$ -dimensional multivariate normal distribution  $X \sim \mathcal{N}(\mu, \Sigma)$ , we have:

$$\mathbb{E}[\|X\|_2^2] = \text{tr}(\Sigma) + \|\mu\|_2^2$$

*Proof.*

$$\mathbb{E}[\|X\|_2^2] = \sum_{i=1}^n \mathbb{E}[X_i^2] = \sum_{i=1}^n (\text{Var}[X_i] + (\mathbb{E}[X_i])^2) = \text{tr}(\Sigma) + \sum_{i=1}^n \mathbb{E}[X_i]^2 = \text{tr}(\Sigma) + \|\mu\|_2^2 \quad (10)$$

□

**Lemma 4.** For a random variable  $X$  that is distributed by an  $n$ -dimensional mixture of  $m$  Gaussians, that is  $X \sim \sum_{i=1}^m \alpha_i \mathcal{N}(\mu_i, \Sigma_i)$  for  $\alpha_i > 0 \quad \forall i$  and  $\sum_{i=1}^m \alpha_i = 1$ :

$$\mathbb{E}[\|X\|_2^2] = \sum_{i=1}^m \alpha_i (\text{tr}(\Sigma_i) + \|\mu_i\|_2^2)$$

*Proof.* By law of conditional expectation:

$$\mathbb{E}[\|X\|_2^2] = \sum_{i=1}^m \mathbb{E}[\mathbb{E}[\|X\|_2^2 | i]] = \sum_{i=1}^m \alpha_i \mathbb{E}[\|X\|_2^2 | i] \quad (11)$$

Since the conditional distribution given the mixture component  $i$  is  $n$ -dimensional Gaussian  $\mathcal{N}(\mu_i, \Sigma_i)$ , from Lemma 3, we have:

$$= \sum_{i=1}^m \alpha_i (\text{tr}(\Sigma_i) + \|\mu_i\|_2^2) \quad (12)$$

□

## Classification Preliminaries

Consider the multi-class classification problem over  $m$  classes. The input domain is given by  $\mathcal{X} \subset \mathbb{R}^Z$ , with an accompanying probability metric  $p_x(\cdot)$  defined over  $\mathcal{X}$ . The training data is given by  $N$  i.i.d. samples  $\mathcal{D} = \{\mathbf{x}_1, \dots, \mathbf{x}_N\}$  drawn from  $\mathcal{X}$ . Each point  $\mathbf{x} \in \mathcal{X}$  has an associated label  $\bar{\mathbf{y}}(\mathbf{x}) = [0, \dots, 1, \dots, 0] \in \mathbb{R}^m$ . We learn a CNN such that for each point in  $\mathcal{X}$ , the CNN induces a conditional probability distribution over the  $m$  classes whose mode matches the label  $\bar{\mathbf{y}}(\mathbf{x})$ .

A CNN architecture consists of a series of convolutional and subsampling layers that culminate in an activation  $\Phi(\cdot)$ , which is fed to an  $m$ -way classifier with weights  $\mathbf{w} = \{\mathbf{w}_1, \dots, \mathbf{w}_m\}$  such that:

$$p(y_i | \mathbf{x}; \mathbf{w}, \Phi(\cdot)) = \frac{\exp(\mathbf{w}_i^\top \Phi(\mathbf{x}))}{\sum_{j=1}^m \exp(\mathbf{w}_j^\top \Phi(\mathbf{x}))} \quad (13)$$

The entropy of conditional probability distribution in Equation 13 is given by:

$$H[p(\cdot|\mathbf{x}; \boldsymbol{\theta})] \triangleq - \sum_{i=1}^m p(y_i|\mathbf{x}; \boldsymbol{\theta}) \log(p(y_i|\mathbf{x}; \boldsymbol{\theta})) \quad (14)$$

The expected entropy over the distribution is given by:

$$\mathbb{E}_{\mathbf{x} \sim p_{\mathbf{x}}} [H[p(\cdot|\mathbf{x}; \boldsymbol{\theta})]] = \int_{\mathbf{x} \sim p_{\mathbf{x}}} H[p(\cdot|\mathbf{x}; \boldsymbol{\theta})] p_{\mathbf{x}}(\mathbf{x}) d\mathbf{x} \quad (15)$$

The empirical average of the conditional entropy over the training set  $\mathcal{D}$  is:

$$\hat{\mathbb{E}}_{\mathbf{x} \sim \mathcal{D}} [H[p(\cdot|\mathbf{x}; \boldsymbol{\theta})]] = \frac{1}{N} \sum_{i=1}^N H[p(\cdot|\mathbf{x}_i; \boldsymbol{\theta})] \quad (16)$$

Diversity  $\nu(\Phi, p_{\mathbf{x}})$  of the features is given by:

$$\nu(\Phi, p_{\mathbf{x}}) \triangleq \sum_{i=1}^n \lambda_i = \text{tr}(\boldsymbol{\Sigma}^*) = \sum_{i=1}^m \alpha_i (\text{tr}(\boldsymbol{\Sigma}_i) + \text{tr}(\boldsymbol{\mu}_i \boldsymbol{\mu}_i^{\top})) = \sum_{i=1}^m \alpha_i (\text{tr}(\boldsymbol{\Sigma}_i) + \|\boldsymbol{\mu}_i\|_2^2) \quad (17)$$

## Appendix 2: Theoretical Results

**Lemma 5.** For the above classification setup, where  $\|\mathbf{w}\|_{\infty} = \max_i (\|\mathbf{w}_i\|_2)$  :

$$H[p(\cdot|\mathbf{x}; \mathbf{w})] \geq \log(C) - 2\|\mathbf{w}\|_{\infty} \|\Phi(\mathbf{x})\|_2 \quad (18)$$

*Proof.* For an input  $\mathbf{x}$ , the conditional probability distribution over  $m$  classes for a statistical model with feature map  $\Phi(\mathbf{x})$  and weights  $\mathbf{w} = (\mathbf{w}_1, \dots, \mathbf{w}_C)$  can be given by:

$$p(y_i|\mathbf{x}; \mathbf{w}) = \frac{\exp(\mathbf{w}_i^{\top} \Phi(\mathbf{x}))}{\sum_{j=1}^C \exp(\mathbf{w}_j^{\top} \Phi(\mathbf{x}))} \quad (19)$$

We can thus write the conditional entropy  $H[p(\cdot|\mathbf{x}; \mathbf{w})]$  for the above sample as:

$$H[p(\cdot|\mathbf{x}; \mathbf{w})] = - \sum_{i=1}^C p(y_i|\mathbf{x}; \mathbf{w}) \log(p(y_i|\mathbf{x}; \mathbf{w})) \quad (20)$$

$$= - \sum_{i=1}^C \left( \frac{\exp(\mathbf{w}_i^{\top} \Phi(\mathbf{x}))}{\sum_{j=1}^C \exp(\mathbf{w}_j^{\top} \Phi(\mathbf{x}))} \cdot \left( \mathbf{w}_i^{\top} \Phi(\mathbf{x}) - \log \left( \sum_{j=1}^C \exp(\mathbf{w}_j^{\top} \Phi(\mathbf{x})) \right) \right) \right) \quad (21)$$

$$= \log \left( \sum_{j=1}^C \exp(\mathbf{w}_j^{\top} \Phi(\mathbf{x})) \right) - \frac{\sum_{i=1}^C (\exp(\mathbf{w}_i^{\top} \Phi(\mathbf{x})) \cdot \mathbf{w}_i^{\top} \Phi(\mathbf{x}))}{\sum_{j=1}^C \exp(\mathbf{w}_j^{\top} \Phi(\mathbf{x}))} \quad (22)$$

$$= \log(m) + \log \left( \frac{1}{C} \sum_{j=1}^C \exp(\mathbf{w}_j^{\top} \Phi(\mathbf{x})) \right) - \frac{\sum_{i=1}^C (\exp(\mathbf{w}_i^{\top} \Phi(\mathbf{x})) \cdot \mathbf{w}_i^{\top} \Phi(\mathbf{x}))}{\sum_{j=1}^C \exp(\mathbf{w}_j^{\top} \Phi(\mathbf{x}))} \quad (23)$$

Since  $\log$  is a concave function:

$$\geq \log(C) + \frac{1}{C} \sum_{j=1}^m (\mathbf{w}_j^{\top} \Phi(\mathbf{x})) - \frac{\sum_{i=1}^C (\exp(\mathbf{w}_i^{\top} \Phi(\mathbf{x})) \cdot \mathbf{w}_i^{\top} \Phi(\mathbf{x}))}{\sum_{j=1}^C \exp(\mathbf{w}_j^{\top} \Phi(\mathbf{x}))} \quad (24)$$

By Lemma 1, we have:

$$\geq \log(C) + \frac{1}{C} \sum_{j=1}^C (\mathbf{w}_j^{\top} \Phi(\mathbf{x})) - \|\mathbf{w}\|_{\infty} \|\Phi(\mathbf{x})\|_2 \quad (25)$$

By Lemma 2, we have:

$$\geq \log(C) - 2\|\mathbf{w}\|_\infty \|\Phi(\mathbf{x})\|_2 \quad (26)$$

□

Now we are ready to prove Theorem 1 from the main paper.

**Theorem 3** (Theorem 1 from Text: Lower Bound on  $\ell_2$ -norm of Classifier). *The expected conditional entropy follows:*

$$\|\mathbf{w}\|_2 \geq \frac{\log(C) - \mathbb{E}_{\mathbf{x} \sim p_x} [\mathbb{H}[p(\cdot|\mathbf{x}; \boldsymbol{\theta})]]}{2\sqrt{\nu(\Phi, p_x)}}$$

*Proof.* From Lemma 5, we have:

$$\mathbb{H}[p(\cdot|\mathbf{x}; \mathbf{w})] \geq \log(C) - 2\|\mathbf{w}\|_\infty \|\Phi(\mathbf{x})\|_2 \quad (27)$$

Since  $\|\mathbf{w}\|_2 = \sqrt{\sum_{i=1}^C \|\mathbf{w}_i\|_2^2} \geq \|\mathbf{w}\|_\infty$ , we have:

$$\mathbb{H}[p(\cdot|\mathbf{x}; \mathbf{w})] \geq \log(C) - 2\|\mathbf{w}\|_2 \|\Phi(\mathbf{x})\|_2 \quad (28)$$

Taking expectation over  $p_x$ , we have:

$$\mathbb{E}_{\mathbf{x} \sim p_x} [\mathbb{H}[p(\cdot|\mathbf{x}; \mathbf{w})]] \geq \log(C) - 2\|\mathbf{w}\|_2 \mathbb{E}_{\mathbf{x} \sim p_x} [\|\Phi(\mathbf{x})\|_2] \quad (29)$$

By Cauchy-Schwarz Inequality,  $\mathbb{E}_{\mathbf{x} \sim p_x} [\|\Phi(\mathbf{x})\|_2] \leq \sqrt{\mathbb{E}_{\mathbf{x} \sim p_x} [\|\Phi(\mathbf{x})\|_2^2]}$ . Using this:

$$\geq \log(C) - 2\|\mathbf{w}\|_2 \sqrt{\mathbb{E}_{\mathbf{x} \sim p_x} [\|\Phi(\mathbf{x})\|_2^2]} \quad (30)$$

By Lemma 4, we have:

$$= \log(C) - 2\|\mathbf{w}\|_2 \sqrt{\sum_{i=1}^m \alpha_i (\text{tr}(\boldsymbol{\Sigma}_i) + \|\mu_i\|_2^2)} \quad (31)$$

Rearranging and using the definition of *Diversity* we have:

$$\|\mathbf{w}\|_2 \geq \frac{\log(C) - \mathbb{E}_{\mathbf{x} \sim p_x} [\mathbb{H}[p(\cdot|\mathbf{x}; \boldsymbol{\theta})]]}{2\sqrt{\nu(\Phi, p_x)}} \quad (32)$$

□

**Lemma 6.** *With probability at least  $1 - \delta/2$ ,*

$$\left| \hat{\mathbb{E}}_{\mathcal{D}} [\mathbb{H}[p(\cdot|\mathbf{x}; \boldsymbol{\theta})]] - \mathbb{E}_{\mathbf{x} \sim p_x} [\mathbb{H}[p(\cdot|\mathbf{x}; \boldsymbol{\theta})]] \right| \leq \|\mathbf{w}\|_\infty \sqrt{\frac{2\hat{\mathbb{E}}_{\mathbf{x} \sim \mathcal{D}} [\|\Phi(\mathbf{x})\|_2^2]}{N} \log\left(\frac{4}{\delta}\right)}$$

*Proof.* Since  $\mathcal{D}$  has i.i.d. samples of  $\mathcal{X}$ , we have:

$$\mathbb{E}_{\mathbf{x} \sim p_x} \left[ \hat{\mathbb{E}}_{\mathcal{D}} [\mathbb{H}[p(\cdot|\mathbf{x}; \mathbf{w})]] \right] = \frac{1}{N} \sum_{i=1}^N \mathbb{E}_{\mathbf{x} \sim p_x} [\mathbb{H}[p(\cdot|\mathbf{x}_i; \mathbf{w})]] = \mathbb{E}_{\mathbf{x} \sim p_x} [\mathbb{H}[p(\cdot|\mathbf{x}; \mathbf{w})]] \quad (33)$$

From Lemma 5, we know that for sample  $\mathbf{x}$ :

$$\log(m) - 2\|\mathbf{w}\|_\infty \|\Phi(\mathbf{x})\|_2 \leq \mathbb{H}[p(\cdot|\mathbf{x}; \mathbf{w})] \leq \log(m) \quad (34)$$

Thus, by applying Hoeffding's Inequality we get:

$$\Pr \left( \left| \hat{\mathbb{E}}_{\mathcal{D}}[H[p(\cdot|\mathbf{x}; \boldsymbol{\theta})]] - \mathbb{E}_{\mathbf{x} \sim p_x} \left[ \hat{\mathbb{E}}_{\mathcal{D}}[H[p(\cdot|\mathbf{x}; \mathbf{w})]] \right] \right| \geq t \right) \leq 2 \exp \frac{-2N^2 t^2}{4\|\mathbf{w}\|_{\infty}^2 \sum_{i=1}^N \|\Phi(\mathbf{x}_i)\|^2} \quad (35)$$

Setting RHS as  $\delta/2$ , we have with probability at least  $1 - \delta/2$ :

$$\left| \hat{\mathbb{E}}_{\mathcal{D}}[H[p(\cdot|\mathbf{x}; \boldsymbol{\theta})]] - \mathbb{E}_{\mathbf{x} \sim p_x}[H[p(\cdot|\mathbf{x}; \boldsymbol{\theta})]] \right| \leq \|\mathbf{w}\|_{\infty} \sqrt{\frac{2\hat{\mathbb{E}}_{\mathbf{x} \sim \mathcal{D}}[\|\Phi(\mathbf{x})\|_2^2]}{N} \log\left(\frac{4}{\delta}\right)} \quad (36)$$

□

**Lemma 7.** *With probability at least  $1 - \delta/2$ , we have:*

$$\hat{\mathbb{E}}_{\mathbf{x} \sim \mathcal{D}}[\|\Phi(\mathbf{x})\|_2^2] \leq \nu(\Phi, p_x) + \sqrt{\frac{\text{Var}_{p_x}[\|\Phi(\mathbf{x})\|_2^2](2/\delta - 1)}{N}} \quad (37)$$

*Proof.* Since  $\mathcal{D}$  has i.i.d. samples of  $\mathcal{X}$ ,

$$\text{Var}_{p_x}[\hat{\mathbb{E}}_{\mathbf{x} \sim \mathcal{D}}[\|\Phi(\mathbf{x})\|_2^2]] = \frac{1}{N^2} \sum_{i=1}^m \text{Var}_{p_x}[\|\Phi(\mathbf{x}_i)\|_2^2] = \frac{\text{Var}_{p_x}[\|\Phi(\mathbf{x})\|_2^2]}{N} \quad (38)$$

Now, by the Cantelli Inequality, we have for  $t > 0$ :

$$\Pr \left( \hat{\mathbb{E}}_{\mathbf{x} \sim \mathcal{D}}[\|\Phi(\mathbf{x})\|_2^2] < \mathbb{E}_{\mathbf{x} \sim p_x}[\|\Phi(\mathbf{x})\|_2^2] + t \right) \geq 1 - \left( 1 + \frac{t^2}{\text{Var}_{p_x}[\hat{\mathbb{E}}_{\mathbf{x} \sim \mathcal{D}}[\|\Phi(\mathbf{x})\|_2^2]]} \right)^{-1} \quad (39)$$

Setting RHS as  $1 - \delta/2$ , we have and solving for  $t$ , we have with probability at least  $1 - \delta/2$ :

$$\hat{\mathbb{E}}_{\mathbf{x} \sim \mathcal{D}}[\|\Phi(\mathbf{x})\|_2^2] \leq \mathbb{E}_{\mathbf{x} \sim p_x}[\|\Phi(\mathbf{x})\|_2^2] + \sqrt{\frac{\text{Var}_{p_x}[\|\Phi(\mathbf{x})\|_2^2](2/\delta - 1)}{N}} \quad (40)$$

Using the result from Lemma 4 and the definition of *Diversity*, we have with probability at least  $1 - \delta/2$ :

$$\hat{\mathbb{E}}_{\mathbf{x} \sim \mathcal{D}}[\|\Phi(\mathbf{x})\|_2^2] \leq \nu(\Phi, p_x) + \sqrt{\frac{\text{Var}_{p_x}[\|\Phi(\mathbf{x})\|_2^2](2/\delta - 1)}{N}} \quad (41)$$

□

**Theorem 4** (Theorem 2 from Main Text: Uniform Convergence of Entropy Estimate). *With probability at least  $1 - \delta$ ,*

$$\left| \hat{\mathbb{E}}_{\mathcal{D}}[H[p(\cdot|\mathbf{x}; \boldsymbol{\theta})]] - \mathbb{E}_{\mathbf{x} \sim p_x}[H[p(\cdot|\mathbf{x}; \boldsymbol{\theta})]] \right| \leq \|\mathbf{w}\|_{\infty} \left( \sqrt{\frac{2}{N} \nu(\Phi, p_x) \log\left(\frac{4}{\delta}\right)} + \Theta(N^{-0.75}) \right)$$

*Proof.* From Lemma 6, we have with probability at least  $1 - \delta/2$ :

$$\left| \hat{\mathbb{E}}_{\mathcal{D}}[H[p(\cdot|\mathbf{x}; \boldsymbol{\theta})]] - \mathbb{E}_{\mathbf{x} \sim p_x}[H[p(\cdot|\mathbf{x}; \boldsymbol{\theta})]] \right| \leq \|\mathbf{w}\|_{\infty} \sqrt{\frac{2\hat{\mathbb{E}}_{\mathbf{x} \sim \mathcal{D}}[\|\Phi(\mathbf{x})\|_2^2]}{N} \log\left(\frac{4}{\delta}\right)} \quad (42)$$

From Lemma 7, we also have with probability at least  $1 - \delta/2$ :

$$\hat{\mathbb{E}}_{\mathbf{x} \sim \mathcal{D}}[\|\Phi(\mathbf{x})\|_2^2] \leq \nu(\Phi, p_x) + \sqrt{\frac{\text{Var}_{p_x}[\|\Phi(\mathbf{x})\|_2^2](2/\delta - 1)}{N}} \quad (43)$$

Combining the above two statements using the Union Bound, we have with probability at least  $1 - \delta$ :

$$\left| \hat{\mathbb{E}}_{\mathcal{D}}[H[p(\cdot|\mathbf{x}; \boldsymbol{\theta})]] - \mathbb{E}_{\mathbf{x} \sim p_{\mathbf{x}}}[H[p(\cdot|\mathbf{x}; \boldsymbol{\theta})]] \right| \leq \|\mathbf{w}\|_{\infty} \sqrt{\frac{2}{N}(\boldsymbol{\nu}(\Phi, p_{\mathbf{x}}) + \sqrt{\frac{\text{Var}_{p_{\mathbf{x}}}[\|\Phi(\mathbf{x})\|_2^2](2/\delta - 1)}{N}}) \log(\frac{4}{\delta})} \quad (44)$$

$$\left| \hat{\mathbb{E}}_{\mathcal{D}}[H[p(\cdot|\mathbf{x}; \boldsymbol{\theta})]] - \mathbb{E}_{\mathbf{x} \sim p_{\mathbf{x}}}[H[p(\cdot|\mathbf{x}; \boldsymbol{\theta})]] \right| \leq \|\mathbf{w}\|_{\infty} \left( \sqrt{\frac{2}{N}(\boldsymbol{\nu}(\Phi, p_{\mathbf{x}}) \log(\frac{4}{\delta}))} + \left( \frac{4\text{Var}_{p_{\mathbf{x}}}[\|\Phi(\mathbf{x})\|_2^2](2/\delta - 1)}{N^3} \right)^{1/4} \log(\frac{4}{\delta}) \right) \quad (45)$$

$$\left| \hat{\mathbb{E}}_{\mathcal{D}}[H[p(\cdot|\mathbf{x}; \boldsymbol{\theta})]] - \mathbb{E}_{\mathbf{x} \sim p_{\mathbf{x}}}[H[p(\cdot|\mathbf{x}; \boldsymbol{\theta})]] \right| \leq \|\mathbf{w}\|_{\infty} \left( \sqrt{\frac{2}{N}\boldsymbol{\nu}(\Phi, p_{\mathbf{x}}) \log(\frac{4}{\delta})} + \Theta(N^{-0.75}) \right) \quad (46)$$

□

**Lemma 8.** *With probability at least  $1 - \delta/2$ ,*

$$\hat{\mathbb{E}}_{\mathcal{D}}[H[p(\cdot|\mathbf{x}; \boldsymbol{\theta})]] \leq \mathbb{E}_{\mathbf{x} \sim p_{\mathbf{x}}}[H[p(\cdot|\mathbf{x}; \boldsymbol{\theta})]] + \|\mathbf{w}\|_2 \sqrt{\frac{2\hat{\mathbb{E}}_{\mathbf{x} \sim \mathcal{D}}[\|\Phi(\mathbf{x})\|_2^2]}{N} \log(\frac{2}{\delta})}$$

*Proof.* Since  $\mathcal{D}$  has i.i.d. samples of  $\mathcal{X}$ , we have:

$$\mathbb{E}_{\mathbf{x} \sim p_{\mathbf{x}}} \left[ \hat{\mathbb{E}}_{\mathcal{D}}[H[p(\cdot|\mathbf{x}; \mathbf{w})]] \right] = \frac{1}{N} \sum_{i=1}^N \mathbb{E}_{\mathbf{x} \sim p_{\mathbf{x}}}[H[p(\cdot|\mathbf{x}_i; \mathbf{w})]] = \mathbb{E}_{\mathbf{x} \sim p_{\mathbf{x}}}[H[p(\cdot|\mathbf{x}; \mathbf{w})]] \quad (47)$$

From Lemma 5, we know that for sample  $\mathbf{x}$ :

$$\log(m) - 2\|\mathbf{w}\|_2\|\Phi(\mathbf{x})\|_2 \leq H[p(\cdot|\mathbf{x}; \mathbf{w})] \leq \log(m) \quad (48)$$

Thus, by applying one-sided Hoeffding's Inequality we get:

$$\Pr \left( \hat{\mathbb{E}}_{\mathcal{D}}[H[p(\cdot|\mathbf{x}; \boldsymbol{\theta})]] - \mathbb{E}_{\mathbf{x} \sim p_{\mathbf{x}}} \left[ \hat{\mathbb{E}}_{\mathcal{D}}[H[p(\cdot|\mathbf{x}; \mathbf{w})]] \right] \geq t \right) \leq \exp \frac{-2N^2 t^2}{4\|\mathbf{w}\|_2^2 \sum_{i=1}^N \|\Phi(\mathbf{x}_i)\|^2} \quad (49)$$

Setting RHS as  $\delta/2$ , we have with probability at least  $1 - \delta/2$ :

$$\hat{\mathbb{E}}_{\mathcal{D}}[H[p(\cdot|\mathbf{x}; \boldsymbol{\theta})]] \leq \mathbb{E}_{\mathbf{x} \sim p_{\mathbf{x}}}[H[p(\cdot|\mathbf{x}; \boldsymbol{\theta})]] + \|\mathbf{w}\|_2 \sqrt{\frac{2\hat{\mathbb{E}}_{\mathbf{x} \sim \mathcal{D}}[\|\Phi(\mathbf{x})\|_2^2]}{N} \log(\frac{2}{\delta})} \quad (50)$$

□

**Corollary 1** (Corollary 1 from the Main Text: Theorem 1 in terms of Variance of Norm). *With probability at least  $1 - \delta$ ,*

$$\|\mathbf{w}\|_2 \geq \frac{\log(C) - \hat{\mathbb{E}}_{\mathbf{x} \sim \mathcal{D}}[H[p(\cdot|\mathbf{x}; \boldsymbol{\theta})]]}{(2 - \sqrt{\frac{2}{N} \log(\frac{2}{\delta})}) \sqrt{\boldsymbol{\nu}(\Phi, p_{\mathbf{x}})} - \Theta(N^{-0.75})}$$

*Proof.* From Lemma 8, we have with probability at least  $1 - \delta/2$ :

$$\hat{\mathbb{E}}_{\mathcal{D}}[H[p(\cdot|\mathbf{x}; \boldsymbol{\theta})]] \leq \mathbb{E}_{\mathbf{x} \sim p_{\mathbf{x}}}[H[p(\cdot|\mathbf{x}; \boldsymbol{\theta})]] + \|\mathbf{w}\|_2 \sqrt{\frac{2\hat{\mathbb{E}}_{\mathbf{x} \sim \mathcal{D}}[\|\Phi(\mathbf{x})\|_2^2]}{N} \log(\frac{2}{\delta})} \quad (51)$$

From Lemma 7, we also have with probability at least  $1 - \delta/2$ :

$$\hat{\mathbb{E}}_{\mathbf{x} \sim \mathcal{D}}[\|\Phi(\mathbf{x})\|_2^2] \leq \boldsymbol{\nu}(\Phi, p_{\mathbf{x}}) + \sqrt{\frac{\text{Var}_{p_{\mathbf{x}}}[\|\Phi(\mathbf{x})\|_2^2](2/\delta - 1)}{N}} \quad (52)$$

Combining the above two statements using the Union Bound, we have with probability at least  $1 - \delta$ :

$$\hat{\mathbb{E}}_{\mathcal{D}}[H[p(\cdot|\mathbf{x}; \boldsymbol{\theta})]] \leq \mathbb{E}_{\mathbf{x} \sim p_{\mathbf{x}}}[H[p(\cdot|\mathbf{x}; \boldsymbol{\theta})]] + \|\mathbf{w}\|_2 \sqrt{\frac{2}{N}(\nu(\Phi, p_{\mathbf{x}}) + \sqrt{\frac{\text{Var}_{p_{\mathbf{x}}}[\|\Phi(\mathbf{x})\|_2^2](2/\delta - 1)}{N}}) \log(\frac{2}{\delta})} \quad (53)$$

From Theorem ??, we know:

$$\|\mathbf{w}\|_2 \geq \frac{\log(C) - \mathbb{E}_{\mathbf{x} \sim p_{\mathbf{x}}}[H[p(\cdot|\mathbf{x}; \boldsymbol{\theta})]]}{2\sqrt{\nu(\Phi, p_{\mathbf{x}})}} \quad (54)$$

Combining this with the previous statement, we have with probability at least  $1 - \delta$ :

$$\|\mathbf{w}\|_2 \geq \frac{\log(C) - \hat{\mathbb{E}}_{\mathbf{x} \sim \mathcal{D}}[H[p(\cdot|\mathbf{x}; \boldsymbol{\theta})]]}{\sqrt{\nu(\Phi, p_{\mathbf{x}})} - \sqrt{\frac{2}{N}(\nu(\Phi, p_{\mathbf{x}}) + \sqrt{\frac{\text{Var}_{p_{\mathbf{x}}}[\|\Phi(\mathbf{x})\|_2^2](2/\delta - 1)}{N}}) \log(\frac{2}{\delta})}} \quad (55)$$

$$\|\mathbf{w}\|_2 \geq \frac{\log(C) - \hat{\mathbb{E}}_{\mathbf{x} \sim \mathcal{D}}[H[p(\cdot|\mathbf{x}; \boldsymbol{\theta})]]}{(2 - \sqrt{\frac{2}{N} \log(\frac{2}{\delta})})\sqrt{\nu(\Phi, p_{\mathbf{x}})} - \Theta(N^{-0.75})} \quad (56)$$

□

### Appendix 3: Training Details on FGVC

**ResNet-50:** Training is done for 40k iterations with batch-size 8 with an initial learning rate of 0.005. Optimal  $\gamma$  for each dataset is given in Table 1.

| Dataset       | $\gamma$ |
|---------------|----------|
| CUB2011       | 0.9      |
| NABirds       | 0.7      |
| Stanford Dogs | 0.7      |
| Cars          | 0.8      |
| Aircraft      | 1        |

Table 1: Regularization parameter  $\gamma$  for ResNet-50 experiments.

**Bilinear and Compact Bilinear CNN:** We follow the training routine given by the authors<sup>1</sup>. Optimal  $\gamma$  for each dataset is given in Table 2.

| Dataset       | $\gamma$ |
|---------------|----------|
| CUB2011       | 1        |
| NABirds       | 1        |
| Stanford Dogs | 1        |
| Cars          | 1        |
| Aircraft      | 1        |

Table 2: Regularization parameter  $\gamma$  for Bilinear CNN experiments.

**DenseNet-161:** Training is done for 40k iterations with batch-size 32 with an initial learning rate of 0.005. Optimal  $\gamma$  for each dataset is given in Table3.

**GoogLeNet:** Training is done for 300k iterations with batch-size 32, with a step size of 30000, decreasing it by a ratio of 0.96 every epoch. Optimal hyperparameters are given in Table 4.

**VGGNet-16:** Training is done for 40k iterations with batch-size 32, with a linear decay of the learning rate from an initial value of 0.1. Optimal  $\gamma$  is given in Table 5.

<sup>1</sup>[https://github.com/gy20073/compact\\_bilinear\\_pooling/tree/master/caffe-20160312/examples/compact\\_bilinear](https://github.com/gy20073/compact_bilinear_pooling/tree/master/caffe-20160312/examples/compact_bilinear)

| <b>Dataset</b> | $\gamma$ |
|----------------|----------|
| CUB2011        | 0.8      |
| NABirds        | 1        |
| Stanford Dogs  | 0.8      |
| Cars           | 1        |
| Aircraft       | 0.8      |

Table 3: Regularization parameter  $\gamma$  for DenseNet-161 experiments.

| <b>Dataset</b> | $\gamma$ |
|----------------|----------|
| CUB-200-2011   | 10       |
| NABirds        | 1        |
| Stanford Dogs  | 1        |
| Cars           | 1        |
| Aircraft       | 1        |

Table 4: Regularization parameter  $\gamma$  for GoogLeNet experiments.

| <b>Dataset</b> | $\gamma$ |
|----------------|----------|
| CUB2011        | 1        |
| NABirds        | 1        |
| Stanford Dogs  | 1        |
| Cars           | 1        |
| Aircraft       | 1        |

Table 5: Regularization parameter  $\gamma$  for VGGNet-16 experiments.

## References

- [1] Stephan Boucheron, Gabor Lugosi, and Pascal Massart. Concentration inequalities: A nonasymptotic theory of independence. CLARENDON PRESS, OXFORD, 2012.
- [2] Colin L Mallows and Donald Richter. Inequalities of chebyshev type involving conditional expectations. *The Annals of Mathematical Statistics*, 40(6):1922–1932, 1969.



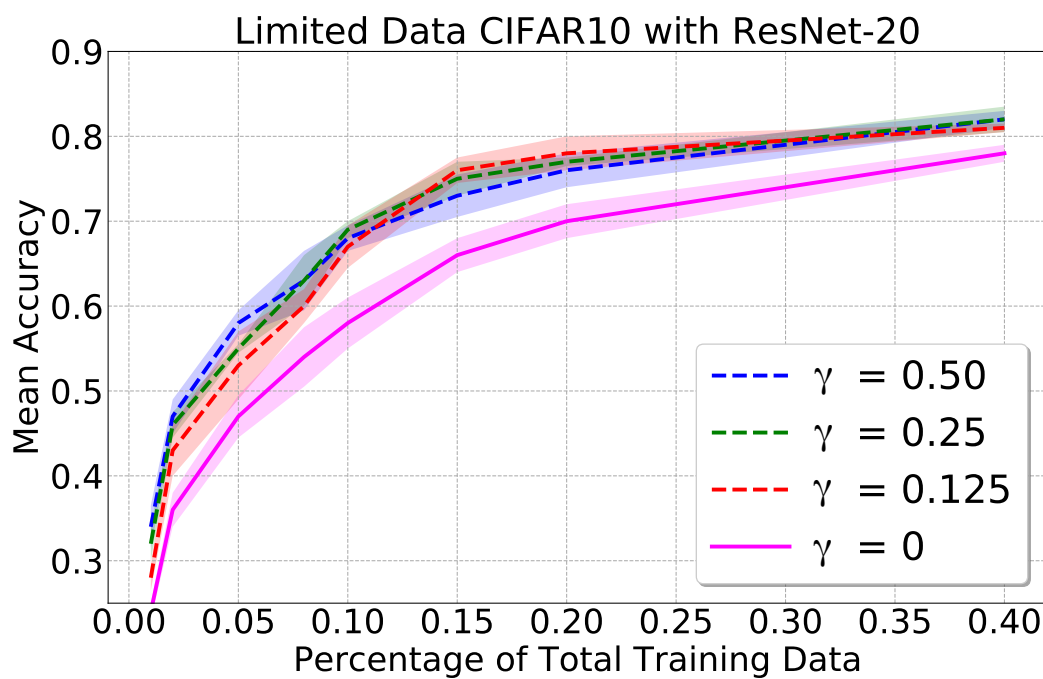

Figure 1: We get consistent improvement in validation accuracy as the amount of training data is increased. Curves plotted for various values of  $\gamma$  on CIFAR10 with model ResNet20.
